# Supplementary material for: Dock8 interacts with Nck1 in mediating Schwann cell precursor migration
Source: PubMed Central journal article supplement — Biochem Biophys Rep. 2016 Mar 24;6:113–23. doi: 10.1016/j.bbrep.2016.03.013 (PMC5600352; doi:10.1016/j.bbrep.2016.03.013), 2016-03-24
Supplement: mmc3.pdf [file mmc3.pdf]

To view the full contents of this document, you need a later version of the PDF viewer. You can upgrade to the latest version of Adobe Reader from [www.adobe.com/products/acrobat/readstep2.html](http://www.adobe.com/products/acrobat/readstep2.html)

For further support, go to [www.adobe.com/support/products/acrreader.html](http://www.adobe.com/support/products/acrreader.html)
